# Supplementary material for: Mid-lumbar (L3) epidural stimulation effects on bladder and external urethral sphincter in non-injured and chronically transected urethane-anesthetized rats
Source: Springer Nature journal article supplement (doi:10.1038/s41598-023-39388-9), 2023-07-28
Supplement: 41598_2023_39388_MOESM1_ESM.pdf [file 41598_2023_39388_MOESM1_ESM.pdf]

**Supplement for:**

**Mid-lumbar (L3) epidural stimulation effects on bladder and external urethral sphincter in non-injured and chronically transected urethane-anesthetized rats.**

Daniel Medina-Aguiñaga, Robert F. Hoey, Natasha Wilkins, Beatrice Ugiliweneza,  
Jason Fell, Susan J. Harkema, and Charles H. Hubscher.

**Supplemental Table 1: Summary of CMG and EUS EMG Data at Baseline**

|                                       | Surgical Shams<br>N=8 | Complete Spinal Transection |                                       |                              |
|---------------------------------------|-----------------------|-----------------------------|---------------------------------------|------------------------------|
|                                       |                       | Partial Burst<br>N=1        | Detrusor Sphincter Dyssynergia<br>N=4 | Overflow Incontinence<br>N=2 |
| Inter-Contraction Interval (sec)      | 109.1 ± 40.9          | 159.38 ± 14.2               | 99.5 ± 28.83                          | 29.9 ± 18.72                 |
| # Non-Void Contractions               | 0                     | 3 ± 1                       | 1.4 ± 1.2                             | 0                            |
| Mean Urethral Opening Pressure (mmHg) | 23.31 ± 5.69          | 31.9 ± 0.93                 | 37.65 ± 4.34                          | 34.34 ± 2.94                 |
| Mean Void Volume (ml)                 | 0.53 ± 0.06           | 0.66 ± 0.04                 | 0.54 ± 0.06                           | 0.103 ± 0.05                 |
| In-Out Ratio                          | 0.98 ± 0.22           | 1.01 ± 0.12                 | 1.4 ± 0.2                             | 0.86 ± 0.12                  |
| EUS # Bursts per Void                 | 0                     | 7.5 ± 0.86                  | 0                                     | 0                            |
| EUS Burst Duration (sec)              | 3.2 ± 0.33            | 2.47 ± 0.77                 | 0                                     | 0                            |

**Supplemental Table 2: Summary of CMG and EUS EMG Data at Optimal scES**

|                                       | Surgical Shams<br>5Hz/300µA<br>N=8 | Complete Spinal Transection       |                                                    |                                           |
|---------------------------------------|------------------------------------|-----------------------------------|----------------------------------------------------|-------------------------------------------|
|                                       |                                    | Partial Burst<br>5Hz/150µA<br>N=1 | Detrusor Sphincter Dyssynergia<br>5Hz/300µA<br>N=4 | Overflow Incontinence<br>5Hz/300µA<br>N=2 |
| Inter-Contraction Interval (sec)      | 109.28 ± 47.51                     | 22.45                             | 74.5 ± 23.33                                       | 18 ± 14.14                                |
| Mean Urethral Opening Pressure (mmHg) | 18.19 ± 4.95                       | 28.6                              | 33.05 ± 10.11                                      | 33 ± 1.5                                  |
| Mean Void Volume (ml)                 | 0.37 ± 0.31                        | 1.28                              | 0.26 ± 0.02                                        | 1.03 ± 0.17                               |
| In-Out Ratio                          | 1.27 ± 1.75                        | 13.68                             | 0.86 ± 0.18                                        | 18.68 ± 12.35                             |
| EUS # Bursts per Void                 | 25.2 ± 11.03                       | 14                                | 0                                                  | 0                                         |
| EUS Burst Duration (sec)              | 2.58 ± 4.58                        | 4.53                              | 0                                                  | 0                                         |
